# Supplementary material for: iSuRe-Cre is a genetic tool to reliably induce and report Cre-dependent genetic modifications
Source: Nat Commun. 2019 May 22;10:2262. doi: 10.1038/s41467-019-10239-4 (PMC6531465; doi:10.1038/s41467-019-10239-4)
Supplement: Supplementary file 1 — Supplementary Information [file 41467_2019_10239_MOESM1_ESM.pdf]

## Supplementary Information

### **iSuRe-Cre is a new genetic tool to reliably induce and report Cre-dependent genetic modifications**

*Macarena Fernández-Chacón, Verónica Casquero-García, Wen Luo, Federica Francesca Lunella,  
Susana Ferreira Rocha, Sergio Del Olmo-Cabrera, Rui Bedito.*

It includes;

Supplementary Figures 1-4 and Supplementary Tables 1 and 2.

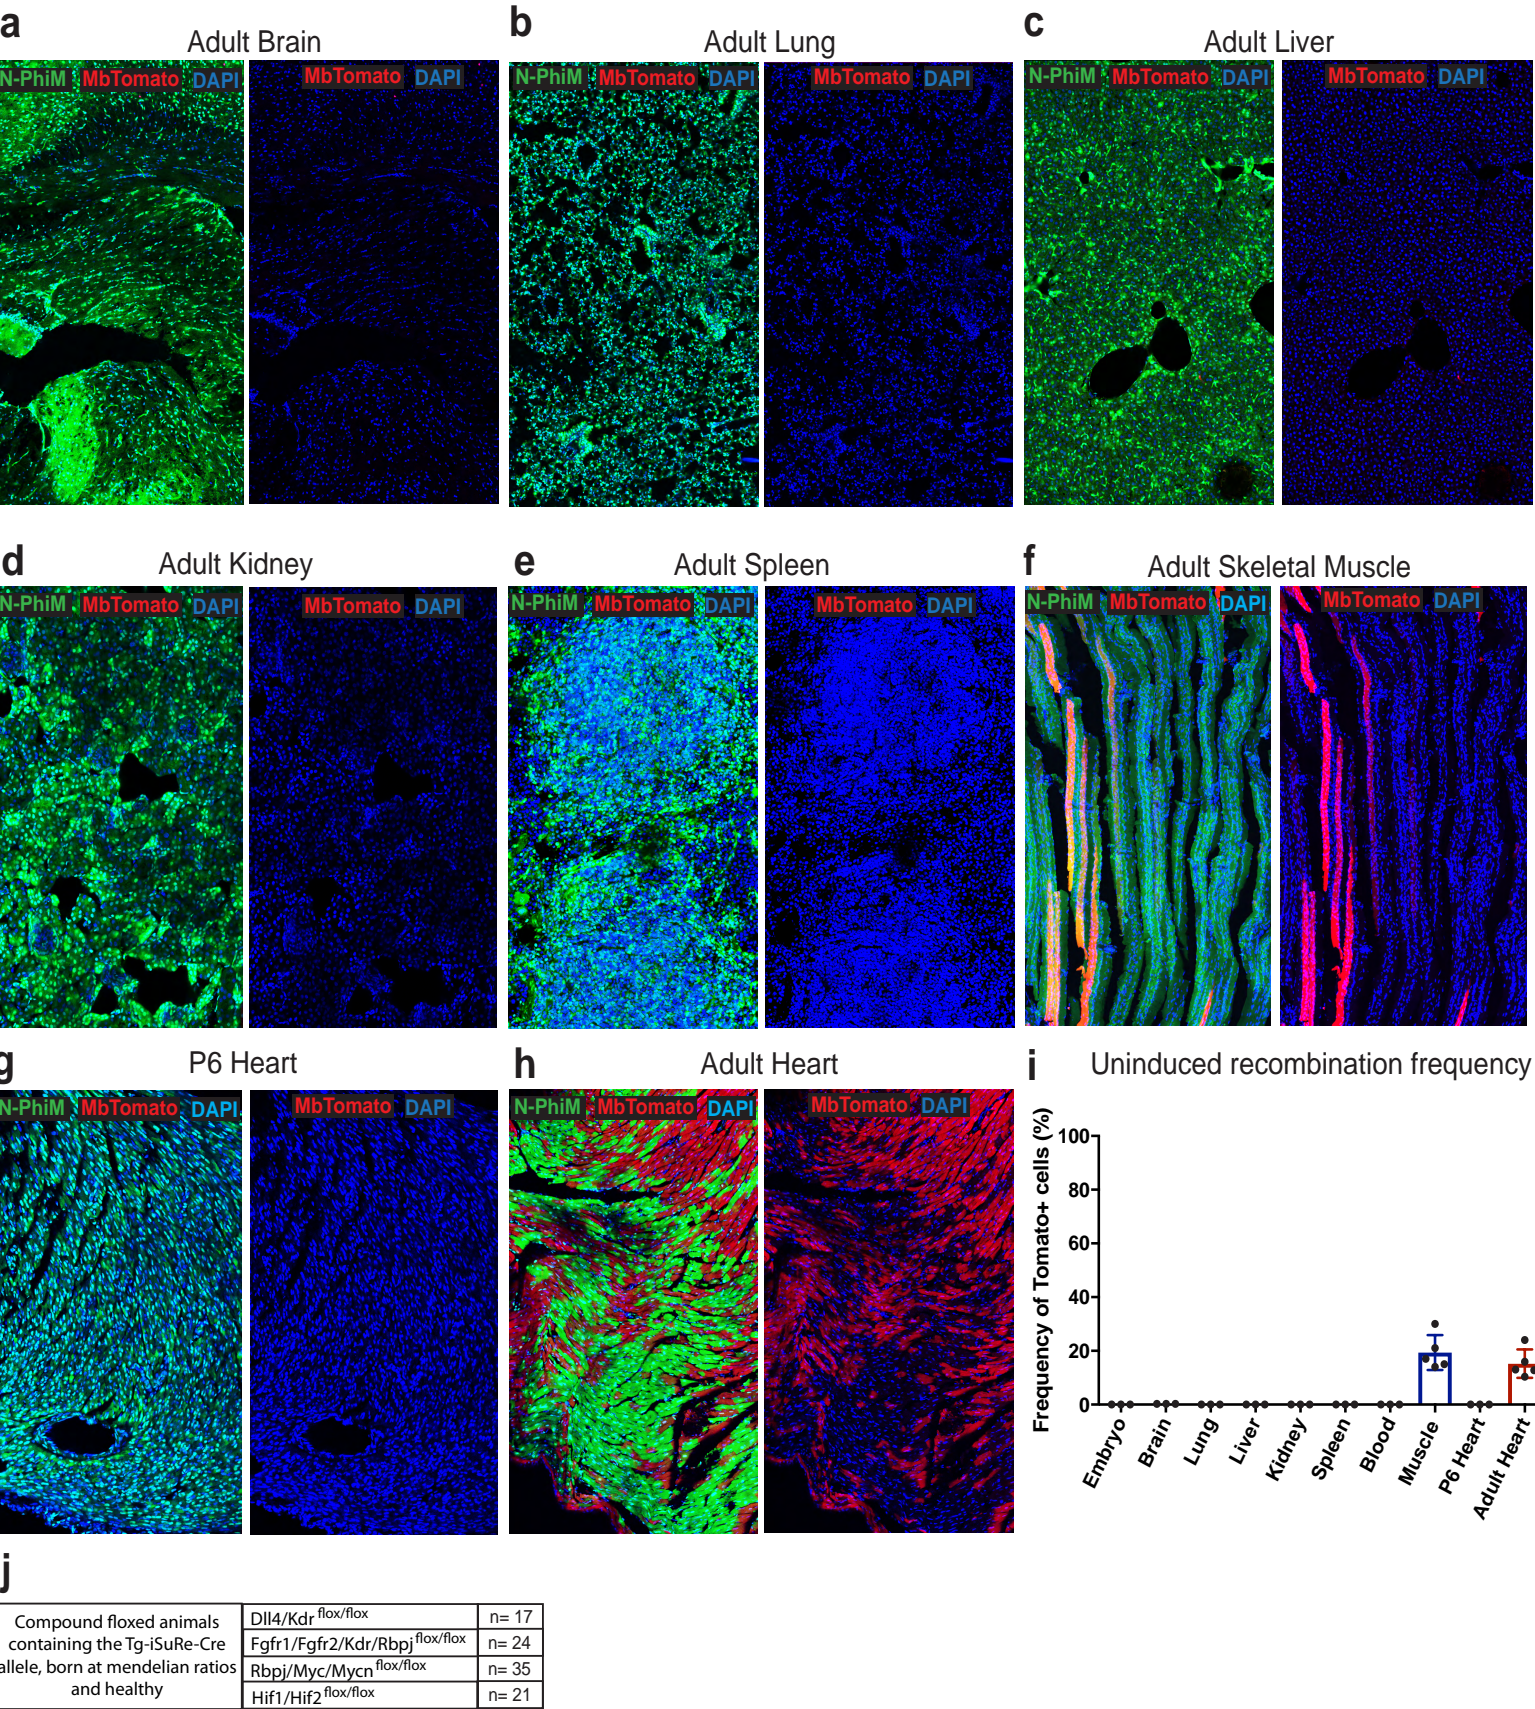

**Supplementary Figure 1. The Tg(iSuRe-Cre) is expressed in all organs and self-recombines in some adult myocytes.**  
**a-e)** Representative confocal micrographs of different mouse organs, showing that the Tg(iSuRe-Cre) allele is expressed in most cell types (N-PhiM-positive) and does not self-recombine (MbTomato-negative) in the cells of the indicated organs.  
**f)** A fraction of adult skeletal muscle fibres self-recombine the Tg(iSuRe-Cre) allele and are MbTomato+.  
**g, h)** A fraction of adult, but not postnatal (P6), cardiomyocytes also self-recombine the allele (MbTomato+).  
**i)** Frequency of non-induced recombination in the embryo, the postnatal heart, and the indicated adult organs. MbTomato+ cells were counted on several immunostained sections and also by whole-organ FACS analysis. Self-recombination of the Tg(iSuRe-Cre) allele is found in only a fraction of quiescent skeletal muscle and cardiac myocytes.  
**j)** Number and genotype of animals obtained with compound floxed alleles and the Tg(iSuRe-Cre) allele. Error bars indicate StDev; each dot represents the mean result obtained per animal and organ.

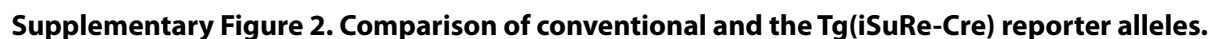

**b)** 4-channel confocal micrographs showing Kdr immunostaining signals in YFP+ and Tomato+ cells of animals with the indicated genotype. DAPI staining was used to identify the nuclei of ECs and segment objects during quantification. iSuRe-Cre Tomato+ cells (yellow arrowheads) recombined the Rosa26-LSL-YFP+ allele, express YFP, and deleted the gene Kdr. In contrast, a significant fraction of YFP+ cells (green arrowheads), still express Kdr. Note that ECs have a very elongated shape, and mutant (Kdr-) cells may be surrounded by wildtype (Kdr+) cells. Only the stronger Kdr signals in the cell body (overlapping with DAPI+ nuclei) was used for the quantifications. Quantification data is shown in Fig. 4g bottom chart.

**c, d**) Charts showing the relative Rbpj and Notch1 mRNA levels in iSure-Cre Tomato + cells (cells were isolated from n=6 and n=5 animals per group respectively).

Error bars in c and d indicate StDev; \*\*\*  $p < 0.0005$ . Two-tailed unpaired T-test. Source data are provided as a Source Data file.

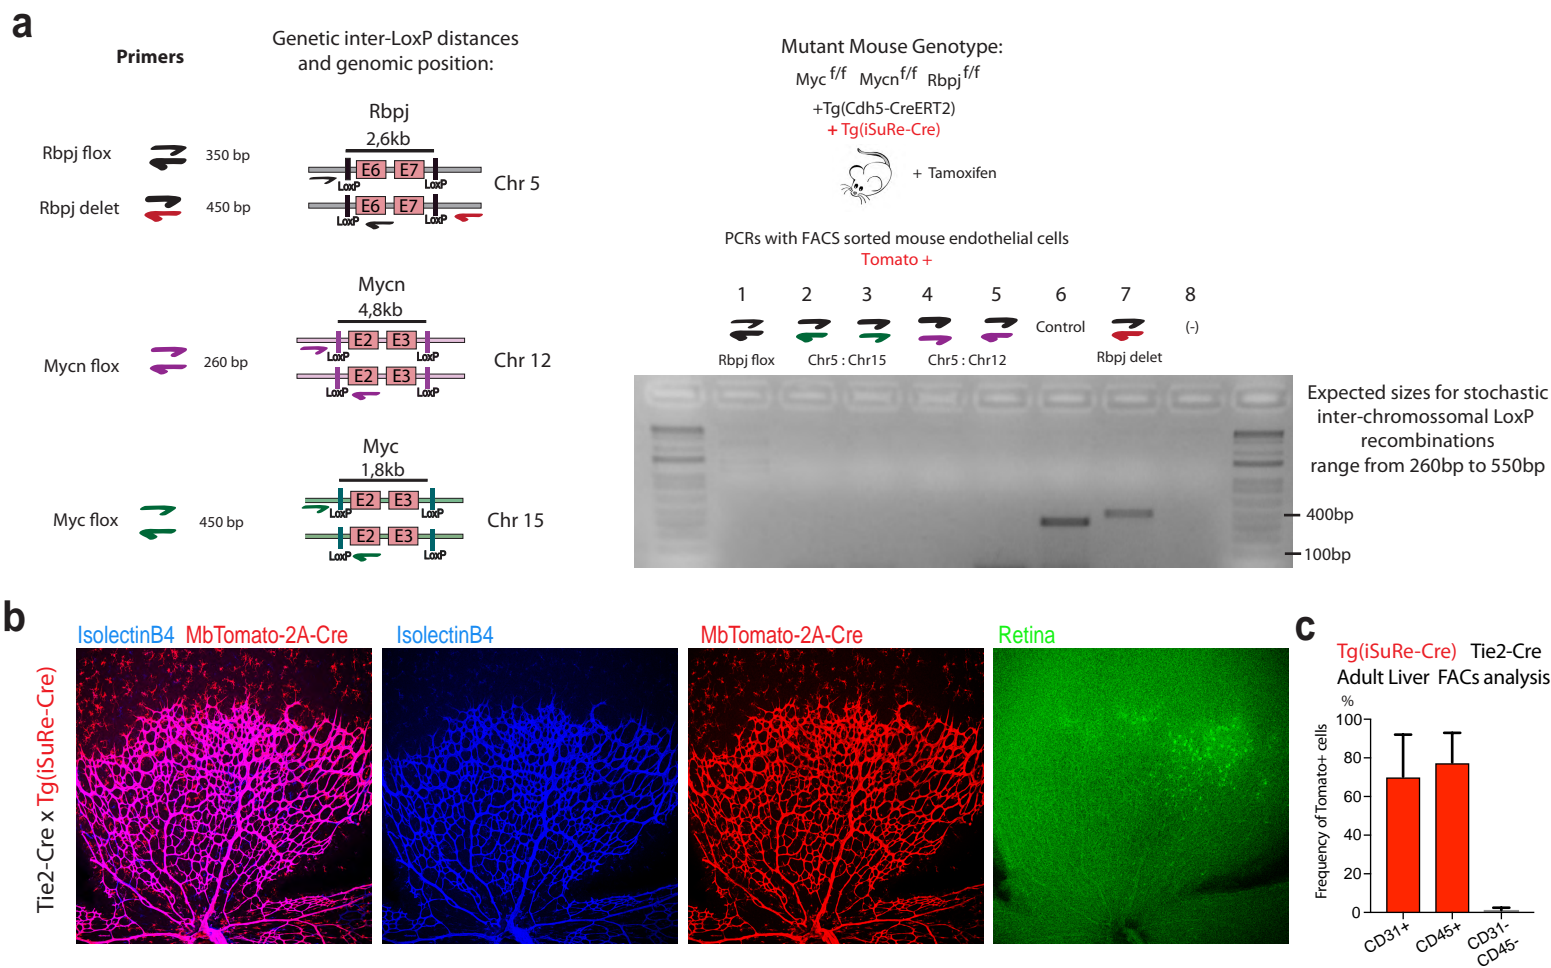

**Supplementary Figure 3. Specificity and interchromosomal recombination analysis in Tg(SuRe-Cre) mice.**

**a)** Schematic representation of the primers used to detect recombination among non-homologous chromosomes containing floxed genes. In cells having 6 alleles floxed and expressing MbTomato-2A-Cre, we could only detect the predicted Rbpj genetic deletion, and not the floxed allele or the non-homologous interchromosomal recombination.

**b)** Representative confocal micrographs of retinas showing that in animals with the Tie2-Cre and Tg(iSuRe-Cre) alleles, MbTomato is only expressed in endothelial (isolectinB4) and blood cells (macrophages, red), and not in the many other cell types present in the retinal tissue (green channel).

**c)** Chart showing that among all liver cells, only CD31+ endothelial and CD45+ blood cells express the MbTomato reporter in animals with the indicated genotype (n=4).

Error bars indicate StDev. Source data are provided as a Source Data file.

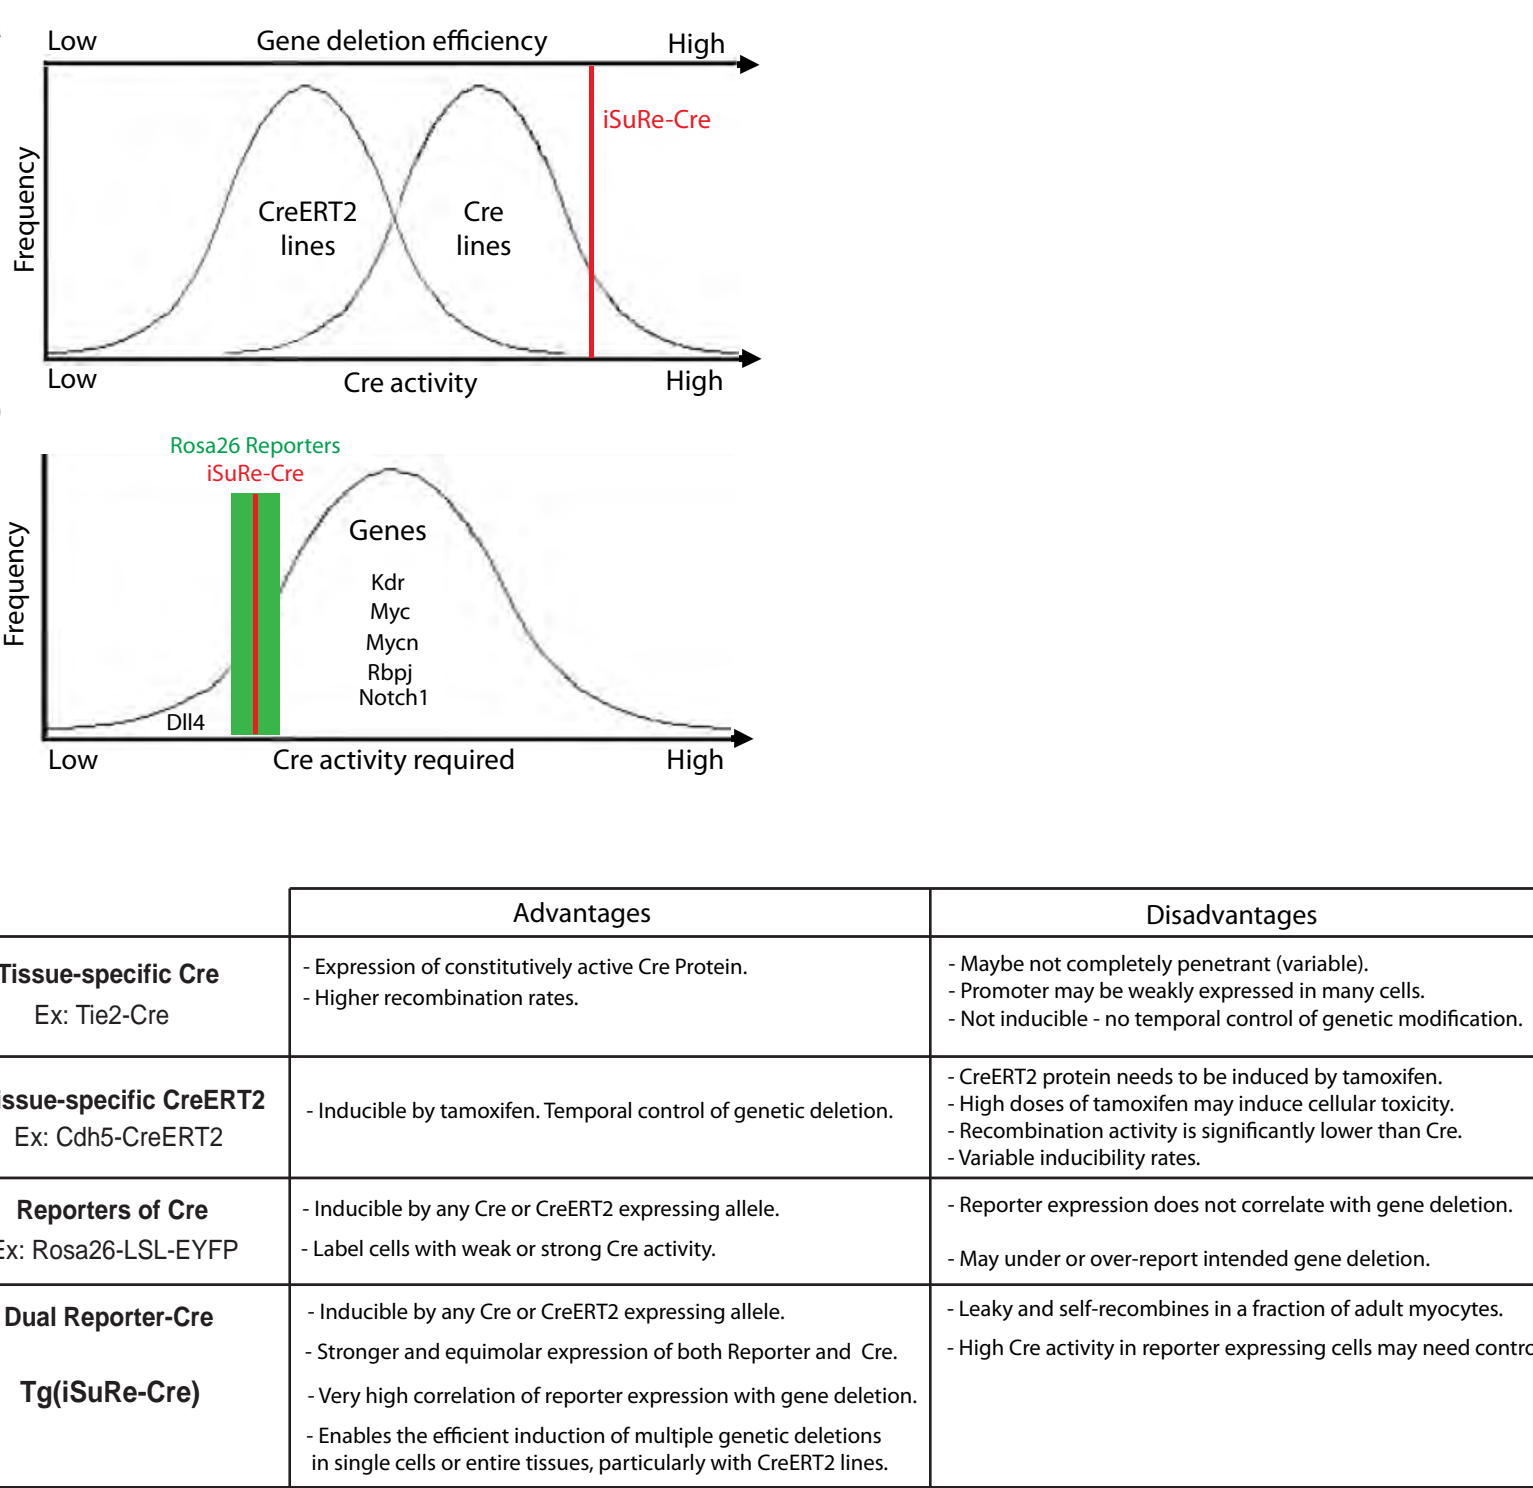

**Supplementary Figure 4. Correlation between Cre activity and gene deletion.**

**a)** Chart representing the theoretically predicted and experimentally observed correlation between Cre activity and efficiency of gene deletion. Constitutive Cre-expressing lines achieve, in general, higher gene deletion efficiencies than tamoxifen-inducible CreERT2 lines. Given the higher Cre expression provided by the iSuRe-Cre allele, the observed gene deletion efficiency is higher with this line than with most other CreERT2 or Cre lines.

**b)** Chart representing the theoretically predicted and experimentally observed correlation between Cre activity and the recombination of reporter alleles or full deletion of genes. Like other conventional Rosa26-reporter alleles, the iSuRe-Cre allele is efficiently induced/recombined at relatively low levels of Cre activity. With the exception of the gene DII4, all the other experimentally tested genes (Kdr, Myc, Mycn, Rbpj and Notch1) are more difficult to delete/recombine than the iSuRe-Cre or Rosa26-reporter alleles. The easier induction of iSuRe-Cre recombination is followed by robust gene deletion because cells express higher levels of both the reporter and Cre.

**c)** Table highlighting the main advantages and disadvantages of each type of Cre or reporter mouse lines.

|             |           | CONTROL Littermates |            |            |            |            |                          | Tg(iSuRe-Cre) |           |           |           |           |                          | p-value      |
|-------------|-----------|---------------------|------------|------------|------------|------------|--------------------------|---------------|-----------|-----------|-----------|-----------|--------------------------|--------------|
|             |           | Control #1          | Control #2 | Control #3 | Control #4 | Control #5 | Mean ± SD                | Mutant #1     | Mutant #2 | Mutant #3 | Mutant #4 | Mutant #5 | Mean ± SD                |              |
| M-MODE SAX  | IVS;d     | 0.643               | 0.796      | 0.735      | 0.766      | 0.735      | <b>0.735 ± 0.057</b>     | 0.643         | 0.674     | 0.682     | 0.674     | 0.735     | <b>0.681 ± 0.033</b>     | <b>0.109</b> |
|             | LVID;d    | 4.594               | 4.196      | 4.594      | 3.920      | 4.716      | <b>4.403 ± 0.334</b>     | 4.410         | 4.134     | 4.134     | 4.196     | 4.318     | <b>4.238 ± 0.122</b>     | <b>0.329</b> |
|             | LVID;s    | 3.430               | 3.277      | 3.675      | 2.664      | 3.675      | <b>3.344 ± 0.416</b>     | 3.522         | 3.093     | 2.971     | 3.124     | 3.399     | <b>3.221 ± 0.230</b>     | <b>0.580</b> |
|             | LVPW;d    | 0.735               | 0.704      | 0.674      | 0.674      | 0.704      | <b>0.698 ± 0.026</b>     | 0.796         | 0.674     | 0.613     | 0.766     | 0.735     | <b>0.716 ± 0.074</b>     | <b>0.613</b> |
|             | %EF       | 50.063              | 44.648     | 41.057     | 60.815     | 44.577     | <b>48.232 ± 7.736</b>    | 41.427        | 50.186    | 54.867    | 50.721    | 43.483    | <b>48.137 ± 5.542</b>    | <b>0.983</b> |
|             | %FS       | 25.333              | 21.898     | 20.000     | 32.031     | 22.078     | <b>24.268 ± 4.744</b>    | 20.139        | 25.185    | 28.148    | 25.547    | 21.277    | <b>24.059 ± 3.291</b>    | <b>0.938</b> |
|             | LV Mass   | 122.187             | 116.852    | 125.655    | 98.667     | 135.146    | <b>119.701 ± 13.516</b>  | 120.433       | 99.052    | 84.918    | 110.642   | 119.410   | <b>106.890 ± 14.987</b>  | <b>0.194</b> |
|             | LV Mass C | 97.750              | 93.482     | 100.524    | 78.933     | 108.117    | <b>95.761 ± 10.813</b>   | 96.346        | 79.242    | 67.934    | 88.513    | 95.528    | <b>85.512 ± 11.990</b>   | <b>0.194</b> |
|             | LV Vol;d  | 97.026              | 78.385     | 97.026     | 66.717     | 103.190    | <b>88.469 ± 15.313</b>   | 88.159        | 75.705    | 75.705    | 78.385    | 83.895    | <b>80.369 ± 5.490</b>    | <b>0.298</b> |
| MITRAL FLOW | LV Vol;s  | 48.452              | 43.388     | 57.190     | 26.143     | 57.190     | <b>46.472 ± 12.811</b>   | 51.637        | 37.711    | 34.168    | 38.627    | 47.415    | <b>41.911 ± 7.302</b>    | <b>0.509</b> |
|             | E         | 628.017             | 853.460    | 898.279    | 810.107    | 798.078    | <b>797.588 ± 102.679</b> | 523.348       | 990.577   | 909.267   | 873.588   | 810.108   | <b>821.377 ± 178.905</b> | <b>0.803</b> |
|             | A         | 257.648             | 430.756    | 358.427    | 376.981    | 481.253    | <b>381.012 ± 84.065</b>  | 110.708       | 316.824   | 307.241   | 378.421   | 332.866   | <b>289.212 ± 103.459</b> | <b>0.162</b> |
|             | E/A       | 2.438               | 1.981      | 2.506      | 2.149      | 1.658      | <b>2.146 ± 0.346</b>     | 4.727         | 3.127     | 2.959     | 2.309     | 1.720     | <b>2.968 ± 1.130</b>     | <b>0.159</b> |
|             | IVRT      | 16.667              | 14.167     | 18.333     | 15.000     | 19.167     | <b>16.666 ± 2.125</b>    | 23.000        | 15.000    | 14.167    | 16.667    | 17.500    | <b>17.266 ± 3.465</b>    | <b>0.750</b> |
| HR          |           | 397.000             | 457.000    | 382.000    | 453.000    | 445.000    | <b>426.800 ± 34.730</b>  | 386.000       | 421.000   | 429.000   | 421.000   | 484.000   | <b>428.200 ± 35.351</b>  | <b>0.951</b> |

| Primer Name                                  | Primer Sequence                                                                               | PCR Ta | Band Size                          | Purpose                                                                     |
|----------------------------------------------|-----------------------------------------------------------------------------------------------|--------|------------------------------------|-----------------------------------------------------------------------------|
| Rosa26 GT Accu F                             | TCAGAGAGCCTCGGCTAGGTAGGG                                                                      | 65C    | 1,200bp                            | To detect gene targeting in Rosa26 locus                                    |
| INS GT Accu R                                | ACTCCAGGACGGAGTCAGTGAGGA                                                                      |        |                                    |                                                                             |
| MTomato F                                    | CCGCTACCTGGTGGAGTTCA                                                                          | 60C    | 350bp                              | To detect Tg(iSuRe-Cre) allele                                              |
| Cre R                                        | TCCCTGAACATGTCCATCAG                                                                          |        |                                    |                                                                             |
| Control Dll4 Wt F                            | GTGCTGGGACTGTAGCCACT                                                                          | 60C    | 430bp                              | To have an internal PCR control for the Mycn, Rbpj and Notch1 floxed PCRs   |
| Control Dll4 Wt R                            | TGTTAGGGATGTCGCTCTCC                                                                          |        |                                    |                                                                             |
| Myc floxed F                                 | TTTTCTTTCCGATTGCTGAC                                                                          | 55C    | 450bp                              | To detect the Myc floxed allele                                             |
| Myc floxed R                                 | TAAGAAGTTGCTATTTTGGC                                                                          |        |                                    |                                                                             |
| Mycn floxed F                                | GTCGCGCTAGTAAGAGCTGAGATC                                                                      | 60C    | 260bp                              | To detect the Mycn floxed allele                                            |
| Mycn floxed R                                | CACAGCTCTGGAAGGTGGGAGAAAGTTGAAGCGTCTCC                                                        |        |                                    |                                                                             |
| Rbpj floxed F                                | ATAATTTGCCAAGCCAAAGC                                                                          | 60C    | 350bp                              | To detect the Rbpj floxed allele                                            |
| Rbpj floxed R                                | GCTCCCCACTGTTGTGAACT                                                                          |        |                                    |                                                                             |
| Control Jag1 Wt F                            | TGAACTCAGGACAGTGCTCT                                                                          | 55C    | 389bp                              | To have an internal PCR control for the Myc floxed PCR                      |
| Control Jag1 Wt R                            | GTTTCAGTGTCTGCCATTGC                                                                          |        |                                    |                                                                             |
| Sv40 pA F<br>MTomato R<br>Chr17 F<br>Chr17 R | CCCCCTGAACCTGAAACATA<br>CCTTGCTACCATGGTCTTG<br>GCTCTGCATGTTGCAAGAAA<br>GTGTCTGTACCAGGTTGGTTTG | 60C    | 260bp Mutant band<br>104bp Wt band | To detect Tg(iSuRe-Cre) allele and distinguish heterozygous from homozygous |
| Notch1 floxed F                              | CTG ACT TAG TAG GGG GAA AAC                                                                   | 60C    | 500bp                              | To detect the Notch1 floxed allele                                          |
| Notch1 floxed R                              | AGT GGT CCA GGG TGT GAG TGT                                                                   |        |                                    |                                                                             |
